# Supplementary material for: Supramolecular confinement synthesis of ultrafine iron nitride nanocrystals for the oxygen reduction reaction in Zn–air batteries
Source: Royal Society of Chemistry journal article supplement (doi:10.1039/d2cy02130g), 2023-01-01
Supplement: d2cy02130g1.pdf [file d2cy02130g1.pdf]

## Electronic Supplementary Information (ESI) for

Supramolecular confinement synthesis of ultrafine iron nitride nanocrystals for  
oxygen reduction reaction in Zn-air batteries

Fanglei Yao,<sup>‡</sup> Jiabao Bi,<sup>‡</sup> Lei Yu,<sup>‡</sup> Liming Dai, Wenkang Xue, Jingyao Deng, Zhihui Yao,  
Yunyan Wu, Jingwen Sun\* and Junwu Zhu

Key Laboratory for Soft Chemistry and Functional Materials, Ministry of Education, Nanjing  
University of Science and Technology, Nanjing, 210094, China.

\* Corresponding author. Jingwen Sun. E-mail: Jingwen\_Sun@njust.edu.cn

<sup>‡</sup>These authors contributed equally.

## Experimental Section

### Preparation of 6-substituted-2,4-diamino-1,3,5-triazine (T monomer)

The 6-substituted-2,4-diamino-1,3,5-triazine (T monomer) was synthesized according to our previous study. Typically, a mixture of dicyandiamide (15 mmol, 1.258 g), sodium hydrogencyanamide (15 mmol, 1.335 g), potassium hydroxide (3 mmol, 0.168 g) and DMSO (10 mL) was added into a Pyrex flask and irradiated using a microwave reactor under 180 °C for 30 minutes. After cooling to room temperature, 150 mL of ethanol was added to the resulted crude mixture. After stirring for 2 hours, the white precipitate (T monomer) was collected by centrifuging, washing with DMF and ethanol, and drying.

### Electrochemical measurement

All the electrochemical tests were carried out on a three-electrode system using Biologic SP-300 electrochemical workstation equipped with a high-speed rotator. The graphite rod and Hg/HgO electrode were used as the counter electrode and reference electrode, respectively. To prepare the working electrode, 2 mg of catalyst and 20  $\mu\text{L}$  of 5 wt% Nafion solution were dispersed in 0.5 mL water/ethanol (V/V=4:1) mixture and sonicated for 30 minutes to form a homogeneous ink. 10  $\mu\text{L}$  of the homogeneous ink was dropped on the surface of glassy carbon (GC) (GCE, 0.196  $\text{cm}^2$ ) and dried at room temperature. The loading of electrocatalysts were 0.2  $\text{mg cm}^{-2}$ . All reference potentials were converted to the reversible hydrogen electrode (RHE) according to the Nernst equation (1):

$$E_{\text{RHE}} = E_{\text{Hg/HgO}} + 0.059 \text{ pH} + 0.098 \dots\dots\dots(1)$$

Where  $E_{\text{RHE}}$  is the potential referenced to a reversible hydrogen electrode,  $E_{\text{Hg/HgO}}$  is the experimentally measured potential using Hg/HgO as the reference electrode.

The cyclic voltammetry (CV) and linear sweep voltammetry (LSV) measurements for ORR were performed at scan rates of 5 mV s<sup>-1</sup> in O<sub>2</sub> saturated 0.1 M KOH electrolyte. The rotating disk electrode (RDE) tests were performed at rotation rates from 400 to 1600 rpm with a sweep speed of 5 mV s<sup>-1</sup>. The electrode stability was tested by chronoamperometric technique at 0.7 V versus RHE for 30000s in 0.1 M KOH. In addition, we reassessed the stability of the electrode by testing chronoamperometric in 3 M methanol.

The hydrogen peroxide yield (%H<sub>2</sub>O<sub>2</sub>) and electron transfer number (n) were calculated using the following equations:

$$\%H_2O_2 = 200 \times \frac{I_d}{I_d + I_r/N} \dots\dots\dots(2)$$

$$n = 4 \times \frac{I_d}{I_d + I_r/N} \dots\dots\dots(3)$$

Where I<sub>d</sub> is the disk current, I<sub>r</sub> is the ring current, and N is the current collection efficiency of the Pt ring.

The Koutecky-Levich equation is (4) and (5):

$$J^{-1} = J_L^{-1} + J_K^{-1} = J_K^{-1} + (B\omega^{0.5})^{-1} \dots\dots\dots(4)$$

$$B = 0.2nF(D_{O_2})^{2/3} \tau^{-1/6} C_{O_2} \dots\dots\dots(5)$$

Where J represents the measured current density, J<sub>K</sub> represents the kinetic current, ω is the rotating rate of the electrode, n is the number of electrons transferred per O<sub>2</sub> molecule, F is the Faraday constant (96485 C mol<sup>-1</sup>), D<sub>O<sub>2</sub></sub> is the diffusion coefficient of O<sub>2</sub> in the electrolyte (1.9×10<sup>-5</sup> cm<sup>2</sup> s<sup>-1</sup>), τ represents the kinetic viscosity of the electrolyte (0.01 cm<sup>2</sup> s<sup>-1</sup>), and C<sub>O<sub>2</sub></sub> denotes the saturated concentration of O<sub>2</sub> (1.2×10<sup>-6</sup> mol cm<sup>-3</sup>) in the aqueous system. 0.2 is a constant to determine B.

### **Zn-air battery tests**

The Zn-air battery was constructed using a Zn plate as the anode electrode, a mixture of 6 M KOH and 0.2 M Zn(Ac)<sub>2</sub> as the electrolyte, and the electrocatalyst layer as the cathode electrode. To prepare the cathode electrode, 4 mg of electrocatalyst was dispersed in a mixture of ultrapure water (800  $\mu$ L), isopropanol (150  $\mu$ L), and Nafion solution (50  $\mu$ L) to form a homogeneous ink. The electrocatalyst ink was dropped on the surface of carbon paper. The loading of electrocatalyst is 2 mg cm<sup>-2</sup> and the available catalyst layer is 2 cm<sup>-2</sup>. The discharge polarization curve and the corresponding power density curve were measured by LSV with a sweep speed of 10 mV/s on the electrochemical workstation at room temperature.

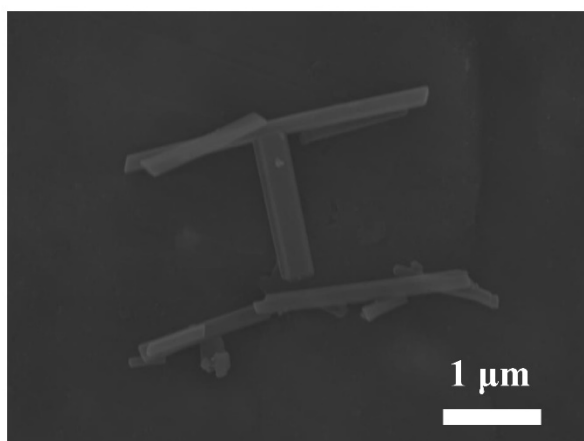

**Fig. S1** SEM image of the Fe-CT.

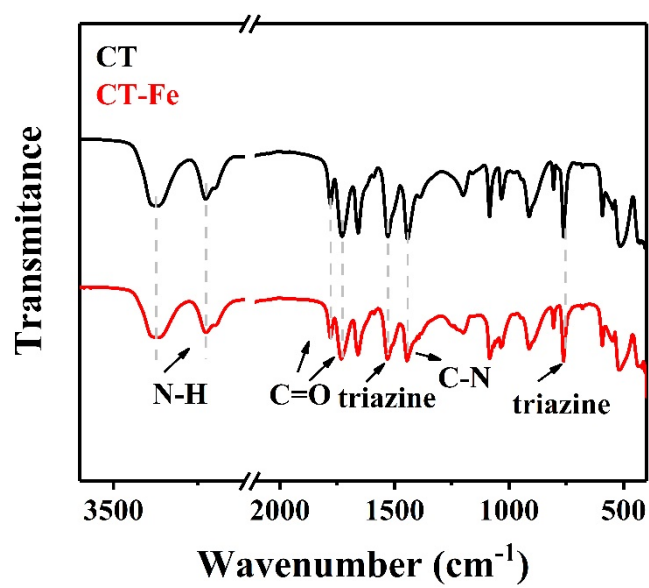

**Fig. S2** FT-IR spectra of CT and CT-Fe precursors

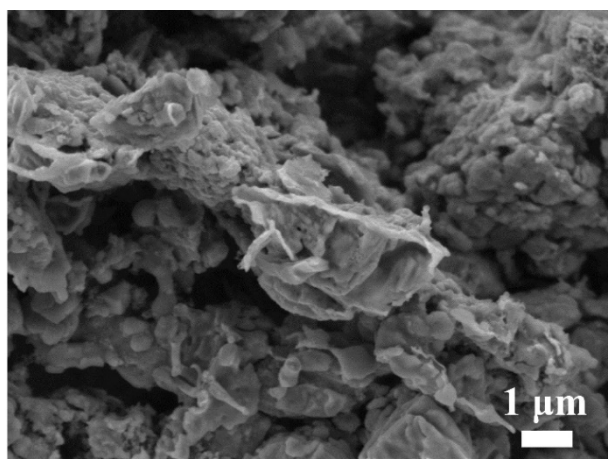

**Fig. S3** SEM image of the NC-800.

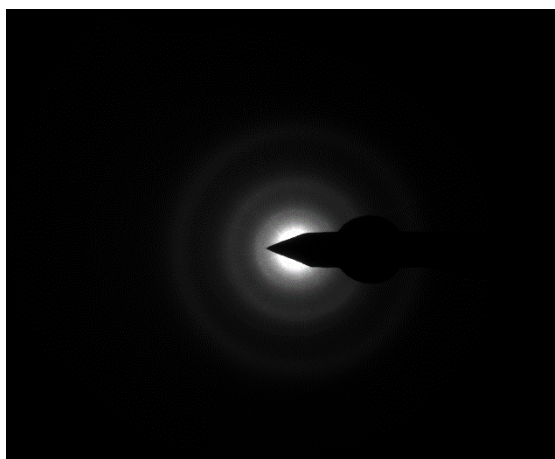

**Fig. S4** SAED image of the Fe<sub>3</sub>N/NC-800.



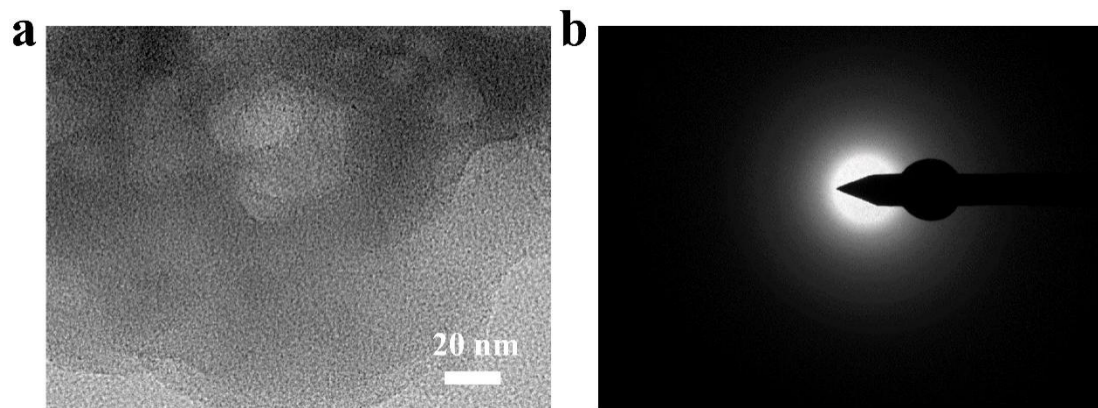

**Fig. S5** (a) TEM image of the  $\text{Fe}_3\text{N/NC-700}$ , (b) SAED image of the  $\text{Fe}_3\text{N/NC-700}$ .

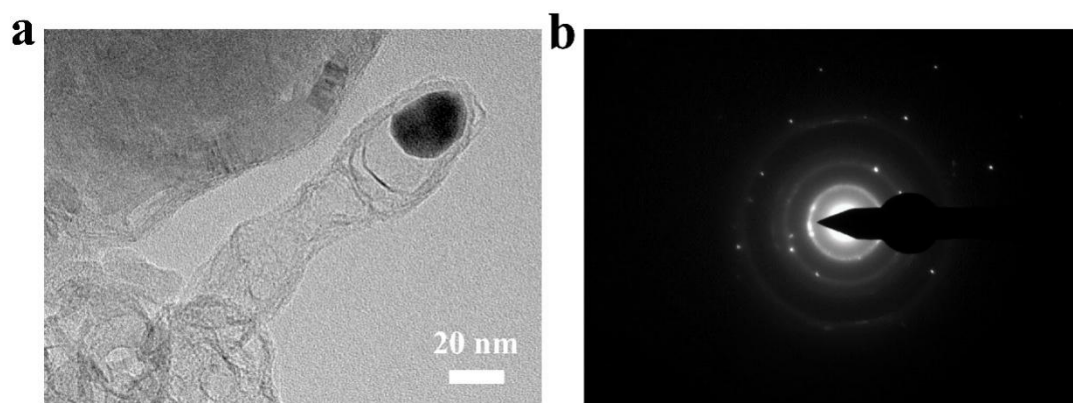

**Fig. S6** (a) TEM image of the Fe<sub>3</sub>N/NC-900, (b) SAED image of the Fe<sub>3</sub>N/NC-900.

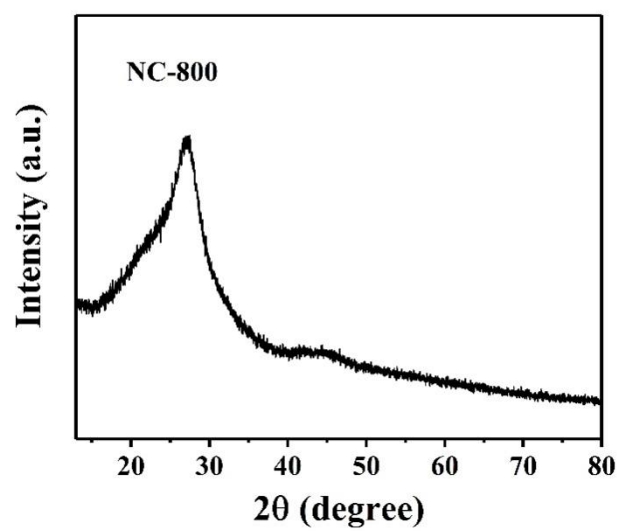

**Fig. S7** XRD pattern of NC-800.

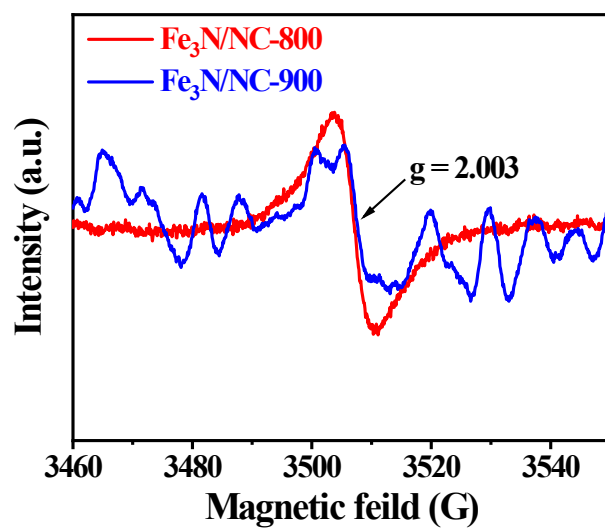

**Fig. S8** EPR spectra of Fe<sub>3</sub>N/NC-800 and Fe<sub>3</sub>N/NC-900.

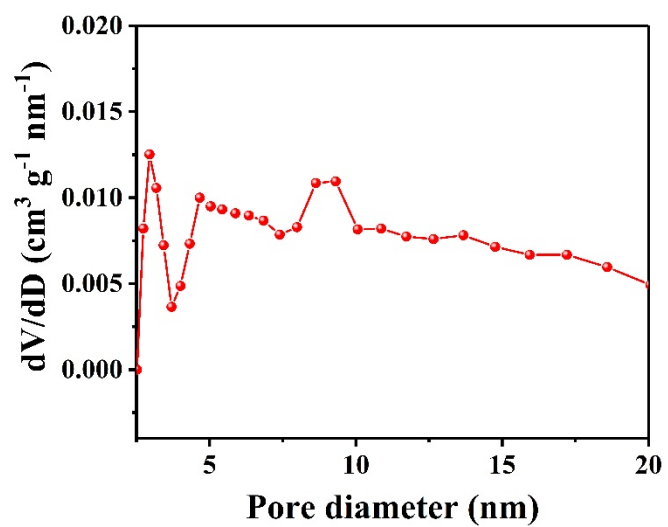

**Fig. S9** The corresponding pore-size distribution curve of Fe<sub>3</sub>N/NC-800.

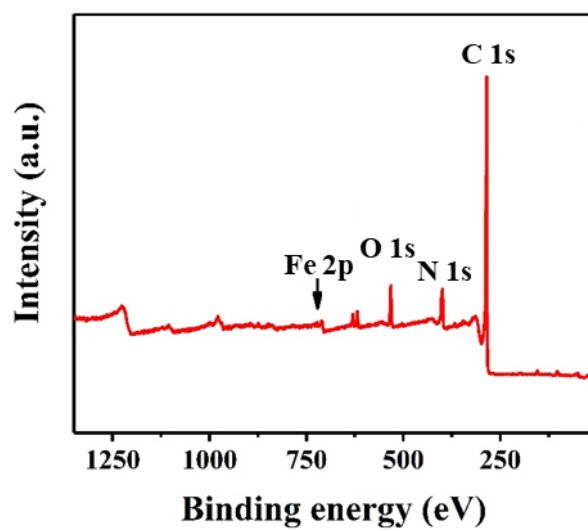

**Fig. S10** XPS survey of Fe<sub>3</sub>N/NC-800.

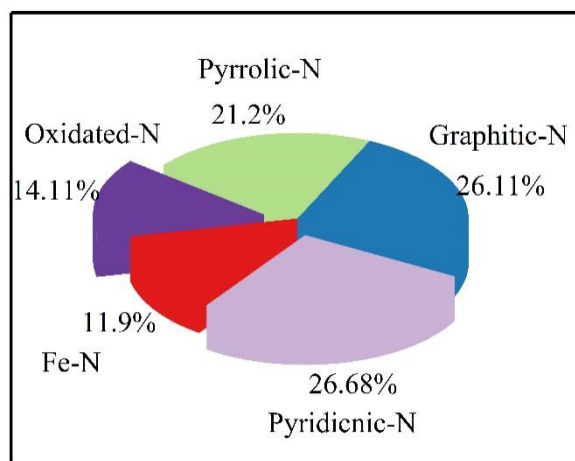

**Fig. S11** The corresponding contents of the deconvoluted N species in the Fe<sub>3</sub>N/NC-800 catalyst.

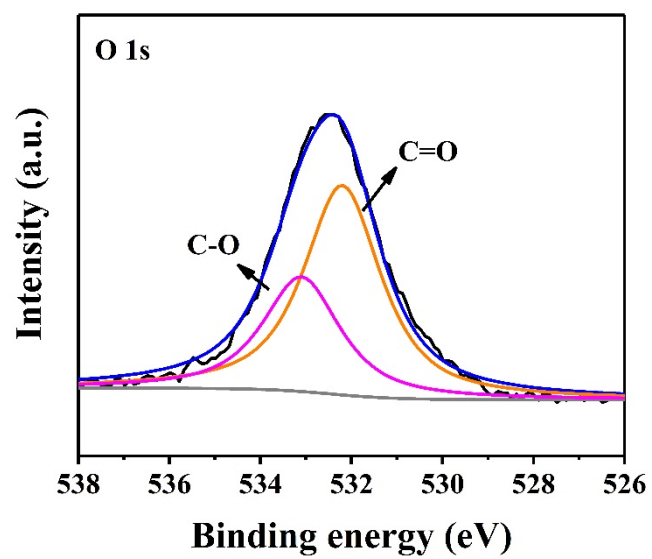

**Fig. S12** O 1s XPS spectrum of Fe<sub>3</sub>N/NC-800.



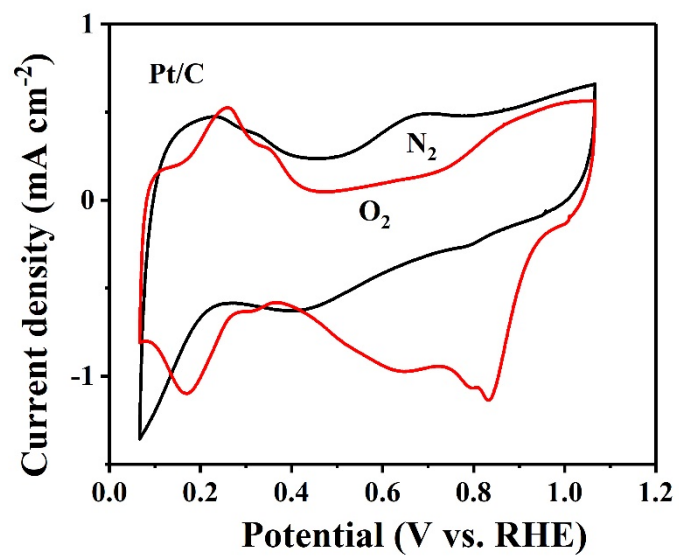

**Fig. S13** CV plots of commercial Pt/C in N<sub>2</sub> and O<sub>2</sub>-saturated 0.1 M KOH electrolytes.

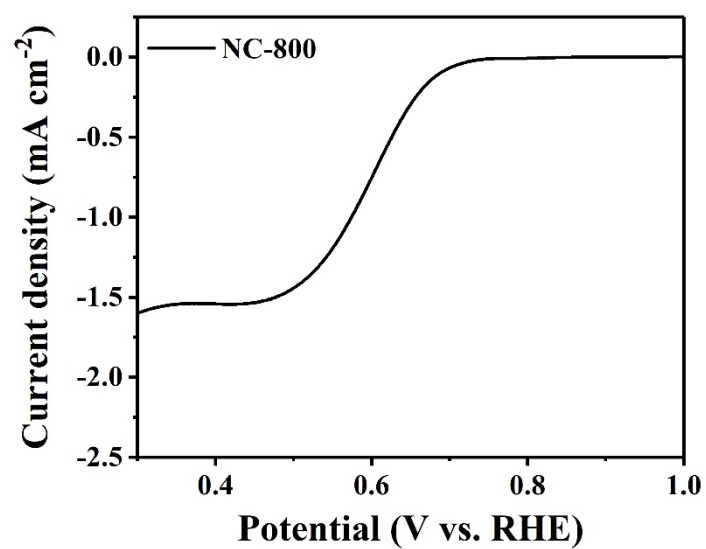

**Fig. S14** ORR polarization plots of NC-800 in the O<sub>2</sub> saturated 0.1 M KOH electrolyte.

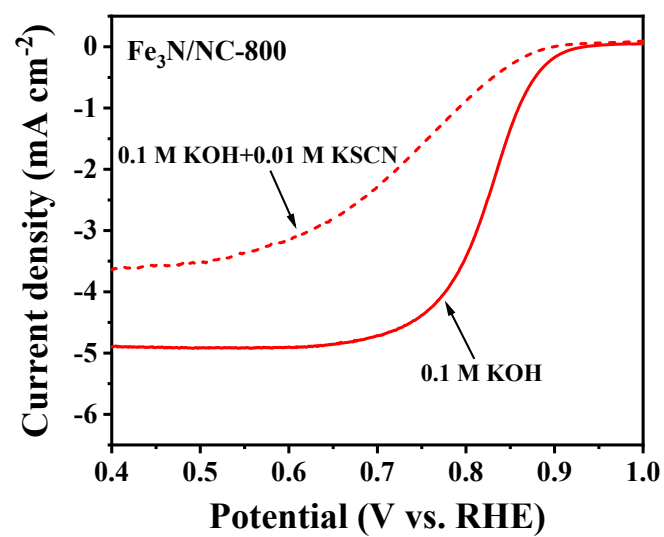

**Fig. S15** ORR polarization curves of Fe<sub>3</sub>N/NC-800 before and after the addition of 0.01 M KSCN in O<sub>2</sub> saturated 0.1 M KOH.

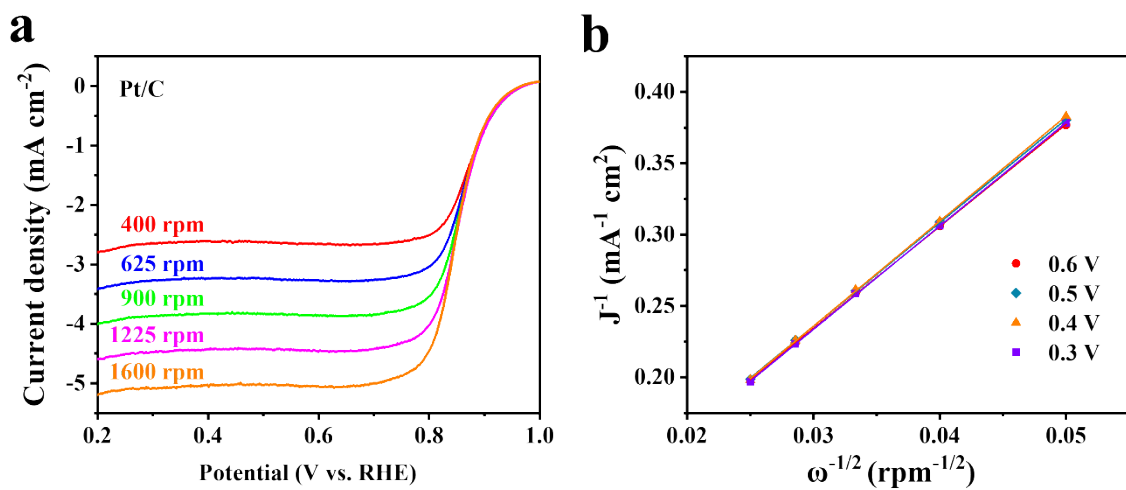

**Fig. S16** (a) Polarization plots of commercial Pt/C at different rotating speeds from 400 to 1600 rpm. (b) The K-L plots of commercial Pt/C at different potentials.

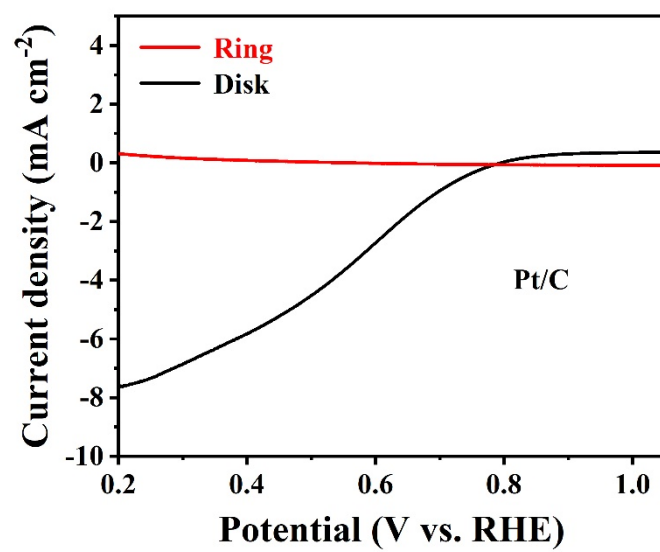

**Fig. S17** RRDE curves of Pt/C.

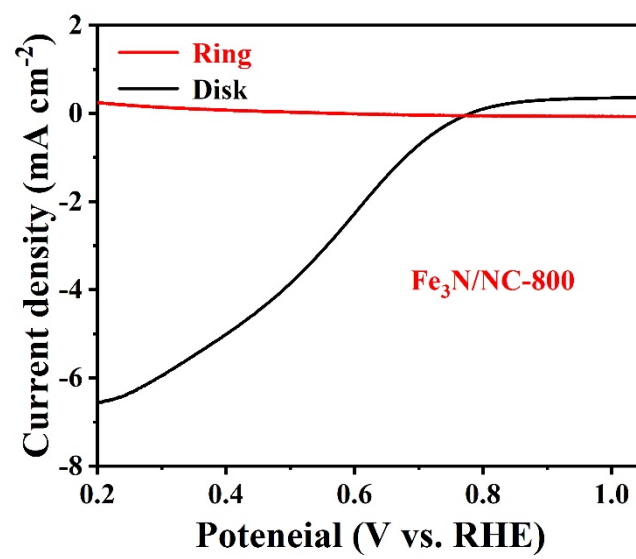

**Fig. S18** RRDE curves of Fe<sub>3</sub>N/NC-800.

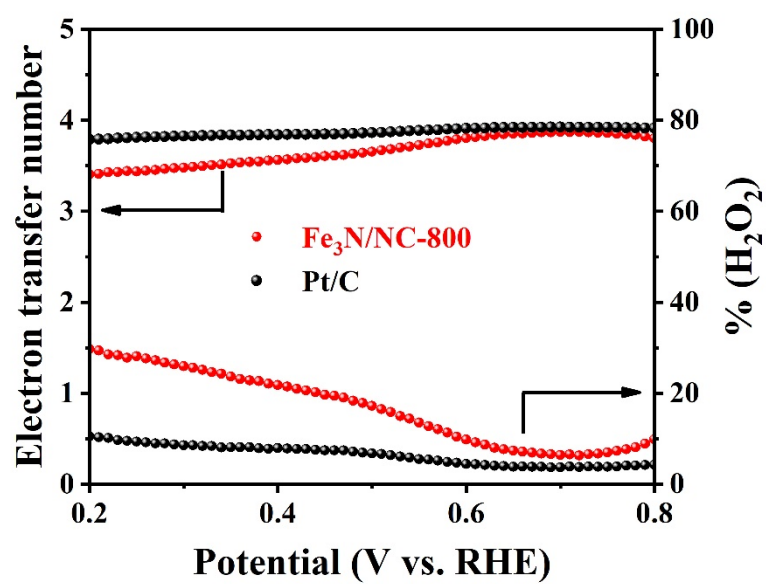

**Fig. S19** Electron transfer number and  $\text{H}_2\text{O}_2$  yield plots of commercial Pt/C and  $\text{Fe}_3\text{N/NC-800}$  at different potentials.

**Table S1.** The element content in Fe<sub>3</sub>N/NC-800 determined by XPS.

| Element content | Atomic % |
|-----------------|----------|
| C               | 82.39    |
| N               | 11.31    |
| O               | 5.49     |
| Fe              | 0.81     |



**Table S2.** The Fe contents in Fe<sub>3</sub>N/NC-700, Fe<sub>3</sub>N/NC-800 and Fe<sub>3</sub>N/NC-900 catalysts determined by ICP-MS.

| Sample            | Fe <sub>3</sub> N/NC-700 | Fe <sub>3</sub> N/NC-800 | Fe <sub>3</sub> N/NC-900 |
|-------------------|--------------------------|--------------------------|--------------------------|
| Fe content (wt %) | 2.26                     | 2.83                     | 7.59                     |
